# Supplementary material for: Can an alkalide act as a perfect Lewis base?
Source: Royal Society of Chemistry journal article supplement (doi:10.1039/d2cp02800j), 2022-01-01
Supplement: d2cp02800j1.pdf [file d2cp02800j1.pdf]

## Supporting Information

### Can Alkalide be a Perfect Lewis Base?

Amlan J. Kalita,<sup>a</sup> Siddhartha K. Purkayastha,<sup>a</sup> Kangkan Sarmah,<sup>a</sup> and Ankur K. Guha<sup>a\*</sup>

<sup>a</sup>Advanced Computational Chemistry Centre, Cotton University, Panbazar, Guwahati, Assam,  
India-781001

\*E-mail: ankurkantiguha@gmail.com

**Table S1.** CCSD(T)-T<sub>1</sub> diagnostic value on the M06-2X/def2-QZVPP optimized geometries.

| <b>System</b>                        | <b>T<sub>1</sub></b> |
|--------------------------------------|----------------------|
| <b>LiBeH<sub>2</sub><sup>-</sup></b> | 0.036                |
| <b>NaBeH<sub>2</sub><sup>-</sup></b> | 0.045                |
| <b>KBeH<sub>2</sub><sup>-</sup></b>  | 0.058                |
| <b>LiMgH<sub>2</sub><sup>-</sup></b> | 0.019                |
| <b>NaMgH<sub>2</sub><sup>-</sup></b> | 0.024                |
| <b>KMgH<sub>2</sub><sup>-</sup></b>  | 0.038                |
| <b>LiCaH<sub>2</sub><sup>-</sup></b> | 0.016                |
| <b>NaCaH<sub>2</sub><sup>-</sup></b> | 0.018                |
| <b>KCaH<sub>2</sub><sup>-</sup></b>  | 0.024                |
| <b>NaBH<sub>3</sub><sup>-a</sup></b> | <b>0.090</b>         |
| <b>NaBH<sub>3</sub><sup>-b</sup></b> | <b>0.046</b>         |

<sup>a</sup> Without broken symmetry. <sup>b</sup> with broken symmetry.

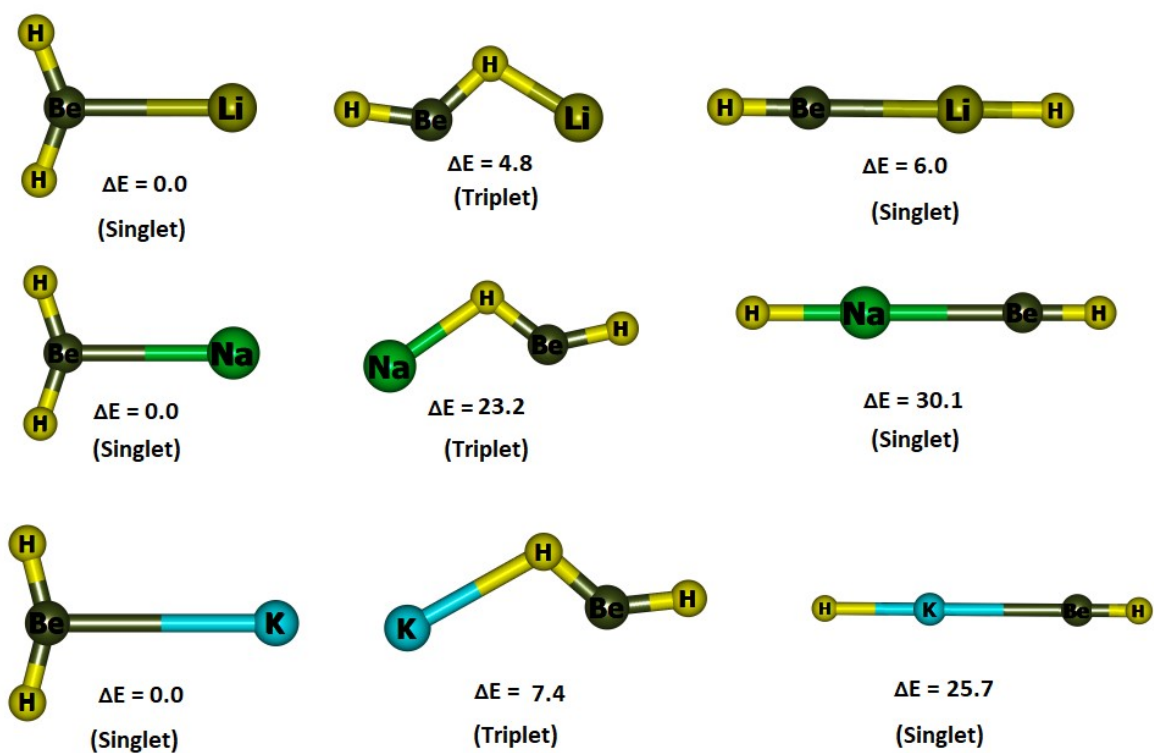

**Figure S1.** Low energy isomers of  $\text{LiBeH}_2^-$ ,  $\text{NaBeH}_2^-$  and  $\text{KBeH}_2^-$  clusters along with their relative energies (kcal/mol) calculated at M06-2X/def2-QZVPP + ZPE level.

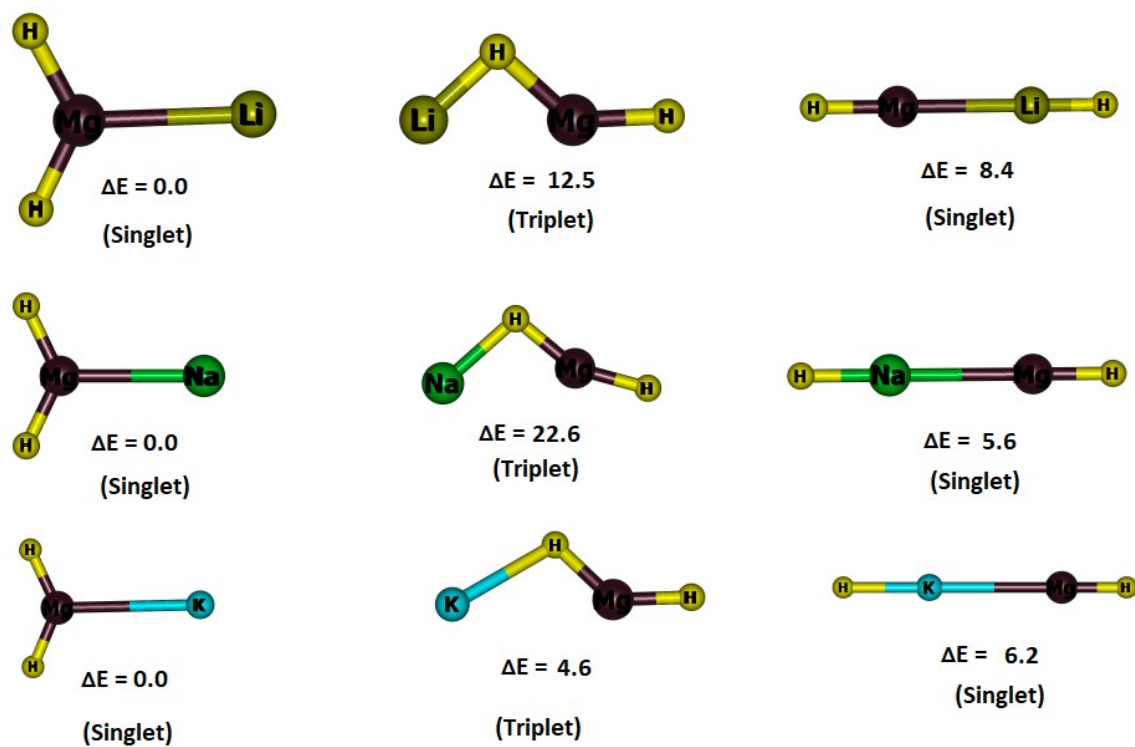

**Figure S2.** Low energy isomers of  $\text{LiMgH}_2^-$ ,  $\text{NaMgH}_2^-$  and  $\text{KMgH}_2^-$  clusters along with their relative energies (kcal/mol) calculated at M06-2X/def2-QZVPP + ZPE level.

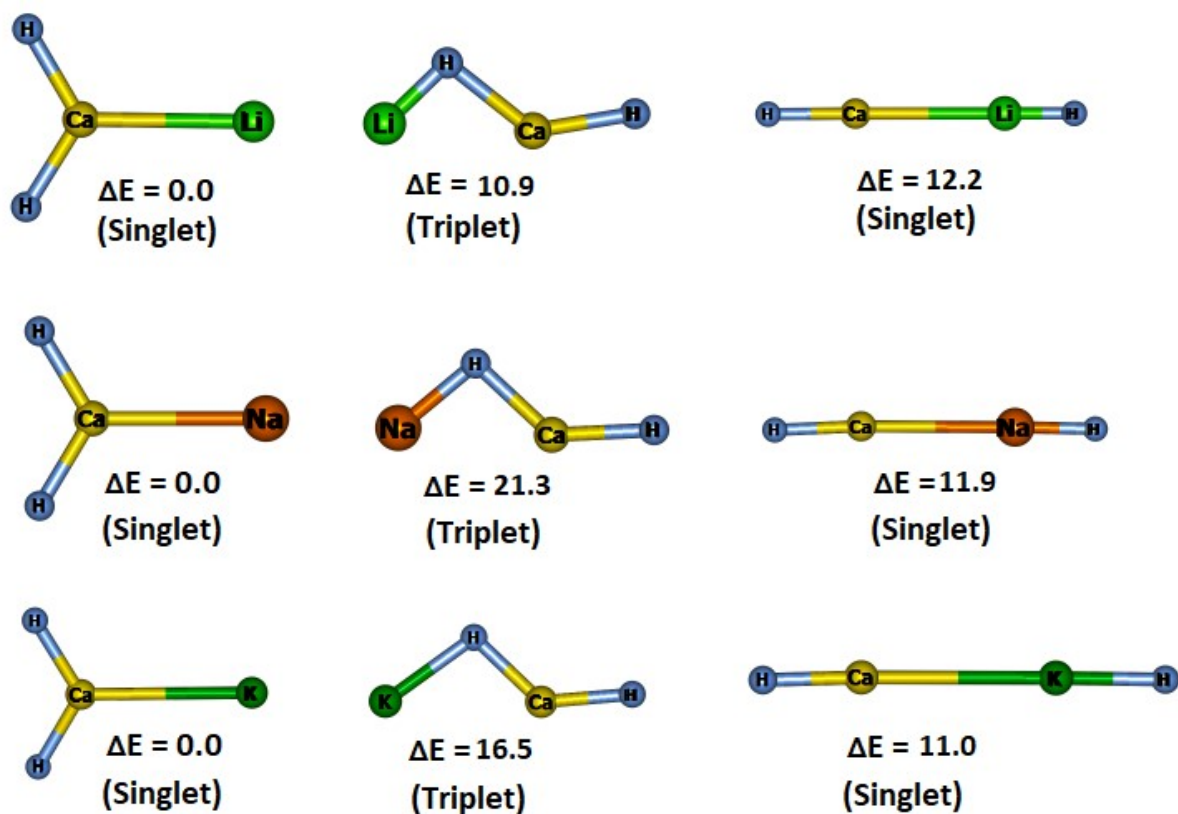

**Figure S3.** Low energy isomers of  $\text{LiCaH}_2^-$ ,  $\text{NaCaH}_2^-$  and  $\text{KCaH}_2^-$  clusters along with their relative energies (kcal/mol) calculated at M06-2X/def2-QZVPP + ZPE level.

Cartesian coordinates of the M06-2X/def2-QZVPP optimized geometries.

**LiBeH<sub>2</sub><sup>-</sup>**

|   |              |              |              |
|---|--------------|--------------|--------------|
| 4 | -0.844470000 | 0.000000000  | -0.000065000 |
| 1 | -1.319882000 | -1.271658000 | 0.000112000  |
| 1 | -1.319880000 | 1.271659000  | 0.000112000  |
| 3 | 2.005881000  | 0.000000000  | 0.000012000  |

**NaBeH<sub>2</sub><sup>-</sup>**

|    |              |              |              |
|----|--------------|--------------|--------------|
| 4  | -1.943521000 | 0.000000000  | -0.000006000 |
| 1  | -2.370494000 | -1.281620000 | 0.000008000  |
| 1  | -2.370490000 | 1.281622000  | 0.000008000  |
| 11 | 1.137733000  | 0.000000000  | 0.000001000  |

**KBeH<sub>2</sub><sup>-</sup>**

|    |              |              |              |
|----|--------------|--------------|--------------|
| 4  | -2.822112000 | 0.000000000  | -0.000239000 |
| 1  | -3.150158000 | -1.300044000 | -0.000246000 |
| 1  | -3.150154000 | 1.300045000  | -0.000246000 |
| 19 | 0.925724000  | 0.000000000  | 0.000076000  |

**LiMgH<sub>2</sub><sup>-</sup>**

|    |              |              |             |
|----|--------------|--------------|-------------|
| 12 | -0.450612000 | 0.000000000  | 0.000000000 |
| 1  | -1.252330000 | -1.567740000 | 0.000001000 |
| 1  | -1.252328000 | 1.567741000  | 0.000001000 |
| 3  | 2.637333000  | 0.000000000  | 0.000000000 |

**NaMgH<sub>2</sub><sup>-</sup>**

|    |              |              |              |
|----|--------------|--------------|--------------|
| 12 | -1.374243000 | 0.000000000  | -0.000100000 |
| 1  | -2.132823000 | -1.578011000 | 0.000485000  |
| 1  | -2.132821000 | 1.578012000  | 0.000485000  |
| 11 | 1.886960000  | 0.000000000  | 0.000021000  |

**KMgH<sub>2</sub><sup>-</sup>**

|    |              |              |              |
|----|--------------|--------------|--------------|
| 12 | -2.148453000 | 0.000000000  | 0.000001000  |
| 1  | -2.855585000 | -1.592562000 | 0.000002000  |
| 1  | -2.855582000 | 1.592563000  | 0.000002000  |
| 19 | 1.657505000  | 0.000000000  | -0.000001000 |

**LiCaH<sub>2</sub><sup>-</sup>**

|    |              |              |              |
|----|--------------|--------------|--------------|
| 20 | -0.328584000 | 0.000000000  | 0.000000000  |
| 1  | -1.409194000 | -1.793285000 | 0.000001000  |
| 1  | -1.409194000 | 1.793285000  | 0.000001000  |
| 3  | 3.130020000  | 0.000000000  | -0.000003000 |

**NaCaH<sub>2</sub><sup>-</sup>**

|    |              |              |              |
|----|--------------|--------------|--------------|
| 20 | 0.000000000  | 1.123115000  | 0.000000000  |
| 1  | -0.000007000 | 2.196890000  | 1.790130000  |
| 1  | -0.000007000 | 2.196890000  | -1.790130000 |
| 11 | 0.000000000  | -2.441461000 | 0.000000000  |

**KCaH<sub>2</sub><sup>-</sup>**

|    |             |              |              |
|----|-------------|--------------|--------------|
| 20 | 0.000000000 | 1.831688000  | 0.000000000  |
| 1  | 0.000000000 | 2.893342000  | 1.791672000  |
| 1  | 0.000000000 | 2.893342000  | -1.791672000 |
| 19 | 0.000000000 | -2.232654000 | 0.000000000  |
